# Supplementary material for: Effects of the variation of metal substitution and electrolyte on the electrochemical reaction of metal hexacyanoferrates
Source: Royal Society of Chemistry journal article supplement (doi:10.1039/c8ra08091g), 2018-01-01
Supplement: c8ra08091g1.pdf [file c8ra08091g1.pdf]

Supporting Information for

Effects of the variation of metal substitution and that of ad-sorbate on electrochemical reaction of metal hexacyanoferrates

Miyuki Asai<sup>a,b</sup>, Akira Takahashi<sup>a</sup>, Kazuki Tajima<sup>a</sup>, Hisashi Tanaka<sup>a</sup>, Manabu Ishizaki<sup>b</sup>, Masato Kurihara<sup>a,b</sup>, and Tohru Kawamoto<sup>a,b</sup> \*

a. Nanomaterials Research Institute, National Institute of Advanced Industrial Science and Technology (AIST), 1-1-1 Higashi, Tsukuba, Ibaraki 305-8565, Japan. E-mail; tohru.kawamoto@aist.go.jp

b. Department of Material and Biological Chemistry, Faculty of Science, Yamagata University, 1-4-12 Kojirakawa-machi, Yamagata 990-8560, Japan,

### 1. Specific surface area analysis

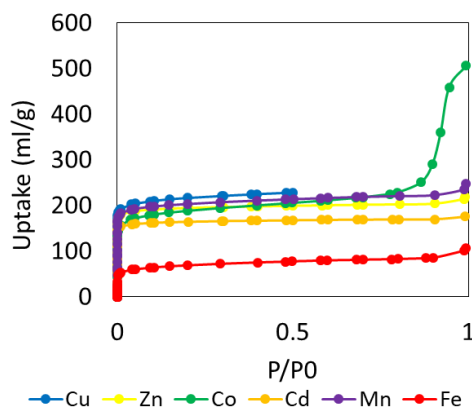

**Figure SI 1.** N<sub>2</sub> adsorption of MHCF

**Table SI1.** Amount of monomolecular layer adsorption and specific surface area.

|    | V <sub>m</sub> (cm <sup>3</sup> /g) | S <sub>BET</sub> (cm <sup>2</sup> /g) |
|----|-------------------------------------|---------------------------------------|
| Cd | 148                                 | 645                                   |
| Fe | 57                                  | 248                                   |
| Mn | 181                                 | 786                                   |
| Co | 162                                 | 705                                   |
| Zn | 168                                 | 731                                   |
| Cu | 196                                 | 852                                   |
| Ni | -                                   | -                                     |

2. CuHCF and CdHCF films coated using spin-coating and applicator.

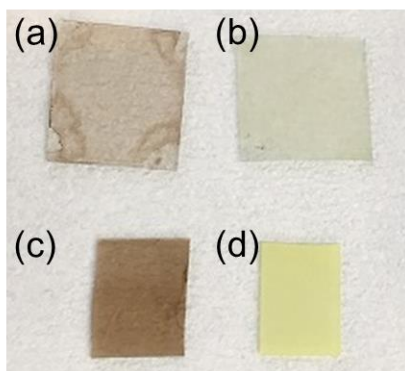

**Figure SI 2.** MHCF thin films for cyclic voltammetry and IR measurement (a) CuHCF by spin-coating (b)CdHCF by applicator (c) CuHCF by spin-coating (d)CdHCF by applicator

3. Parameters of Gaussian function for IR spectra fitting

Gaussian function;  $y=A\exp(-(x-x_0)^2/2\alpha^2)$

Area of peak;  $S=\sqrt{2\pi}A\alpha$

Table SI2. Parameters of Gaussian function for IR spectra.

|                  |                    |        | A      | $\alpha$ | $x_0$ | S    |        |    |          |        |
|------------------|--------------------|--------|--------|----------|-------|------|--------|----|----------|--------|
| CN               | CN-1               | Na     | 0.426  | 9.85     | 2095  | 10.5 | linear | Na | -1.7E-04 | 0.245  |
|                  |                    | K      | 0.458  | 9.60     | 2096  | 11.0 |        | K  | -1.5E-04 | 0.198  |
|                  | CN-2               | Na     | 0.243  | 28.9     | 2081  | 17.6 |        |    |          |        |
|                  |                    | K      | 0.262  | 29.8     | 2081  | 19.6 |        |    |          |        |
| CN-3             | Na                 | 0.0579 | 56.0   | 2012     | 8.12  |      |        |    |          |        |
|                  | K                  | 0.0681 | 58.1   | 2005     | 9.92  |      |        |    |          |        |
| H <sub>2</sub> O | H <sub>2</sub> O-1 | Na     | 0.0565 | 9.64     | 1606  | 1.36 | linear | Na | -9.1E-05 | 0.0830 |
|                  |                    | K      | 0.0519 | 8.56     | 1603  | 1.11 |        | K  | -8.5E-05 | 0.0673 |
|                  | H <sub>2</sub> O-2 | Na     | 0.0597 | 46.1     | 1617  | 6.90 |        |    |          |        |
|                  |                    | K      | 0.0599 | 46.5     | 1617  | 6.97 |        |    |          |        |
